# Supplementary material for: Population-based surveillance for hypertension awareness, treatment, and control in nine districts - India Hypertension Control Initiative, 2018–19
Source: Springer Nature journal article supplement (doi:10.1038/s41371-025-01005-9), 2025-03-22
Supplement: MOESM1 [file 41371_2025_1005_MOESM1_ESM.pdf]

**Supplementary Table 1: List of IHCI districts and selected districts for the survey**

| States         | IHCI project districts                                                                                                                     | Community survey districts |
|----------------|--------------------------------------------------------------------------------------------------------------------------------------------|----------------------------|
| Punjab         | Mansa, Bhatinda, Gurdaspur, Pathankot, and Hoshiarpur                                                                                      | Bhatinda, Hoshiarpur       |
| Madhya Pradesh | Bhopal, Chhindwara, and Ratlam                                                                                                             | Chhindwara, Ratlam         |
| Maharashtra    | Bhandara, Satara, Sindhudurg, and Wardha                                                                                                   | Wardha                     |
| Telangana      | Karimnagar, Jagtial, Rajanna Siricilla, Peddapally, Jayashankar Bhupallapally, Warangal (Urban), Warangal (Rural), Jangaon and Mahabubabad | Jagtial, Jangaon           |
| Kerala         | Kannur, Thiruvananthapuram, Thrissur, and Wayanad                                                                                          | Kannur, Thrissur           |

Supplementary Table 2: Mean age, body mass index, systolic and diastolic blood pressure (average of second and third reading) among all people with hypertension, among those aware of the diagnosis, and newly detected hypertensives in nine districts in India, 2018-19.

|                                 | <b>Hypertension</b> |                    |                 | <b>Aware of Hypertension Diagnosis</b> |                    |                 | <b>Newly Detected Hypertension</b> |                    |                 |
|---------------------------------|---------------------|--------------------|-----------------|----------------------------------------|--------------------|-----------------|------------------------------------|--------------------|-----------------|
|                                 | Male<br>(n=2956)    | Female<br>(n=4091) | All<br>(n=7047) | Male<br>(n=1264)                       | Female<br>(n=2427) | All<br>(n=3691) | Male<br>(n=1692)                   | Female<br>(n=1664) | All<br>(n=3356) |
|                                 | Mean (SD)           | Mean (SD)          | Mean (SD)       | Mean (SD)                              | Mean (SD)          | Mean (SD)       | Mean (SD)                          | Mean (SD)          | Mean (SD)       |
| Age                             | 48 (13)             | 53 (11)            | 51 (12)         | 53 (11)                                | 55 (10)            | 54 (11)         | 45 (13)                            | 50 (12)            | 47 (13)         |
| Systolic blood pressure (mmHg)  | 152 (18)            | 152 (19)           | 152 (19)        | 151 (21)                               | 150 (21)           | 150 (21)        | 153 (15)                           | 155 (16)           | 154 (15)        |
| Diastolic blood pressure (mmHg) | 92 (11)             | 87 (11)            | 90 (12)         | 90 (13)                                | 86 (12)            | 87 (12)         | 94 (10)                            | 90 (10)            | 92 (10)         |
| Body mass index (kg/m2)         | 25.1 (4.6)          | 26.0 ( 5.2)        | 25.6 (5.0)      | 25.7 (4.6)                             | 26.7 (5.2)         | 26.4 (5.0)      | 24.6 (4.5)                         | 25.0 (5.1)         | 24.8 (4.8)      |

**Supplementary Table 3: Prevalence, awareness, treatment, and control of hypertension by age groups and gender in nine districts in India, 2018-19.**

| State - District                   |      | Prevalence |                  | Aware |                  | Treatment |                  | Control |                  | Treatment among aware |                  | Control among aware |                  |
|------------------------------------|------|------------|------------------|-------|------------------|-----------|------------------|---------|------------------|-----------------------|------------------|---------------------|------------------|
|                                    | N    | n          | % (95% CI)       | n     | % (95% CI)       | n         | % (95% CI)       | n       | % (95% CI)       | n                     | % (95% CI)       | n                   | % (95% CI)       |
| <b>Punjab - Hoshiarpur</b>         |      |            |                  |       |                  |           |                  |         |                  |                       |                  |                     |                  |
| Male                               | 1178 | 442        | 37.5 [34.8,40.3] | 185   | 41.9 [37.3,46.5] | 147       | 33.3 [29.0,37.8] | 26      | 5.9 [4.0,8.5]    | 147                   | 79.5 [73.0,84.7] | 26                  | 14.1 [9.8,19.8]  |
| Female                             | 1970 | 591        | 30.0 [28.0,32.1] | 419   | 70.9 [67.1,74.4] | 378       | 64.0 [60.0,67.7] | 122     | 20.6 [17.6,24.1] | 378                   | 90.2 [87.0,92.7] | 122                 | 29.1 [25.0,33.7] |
| <45 years                          | 1886 | 350        | 18.6 [16.9,20.4] | 164   | 46.9 [41.7,52.1] | 135       | 38.6 [33.6,43.8] | 54      | 15.4 [12.0,19.6] | 135                   | 82.3 [75.7,87.4] | 54                  | 32.9 [26.2,40.5] |
| >=45 years                         | 1262 | 683        | 54.1 [51.4,56.9] | 440   | 64.4 [60.8,67.9] | 390       | 57.1 [53.4,60.8] | 94      | 13.8 [11.4,16.6] | 390                   | 88.6 [85.3,91.3] | 94                  | 21.4 [17.8,25.4] |
| All                                | 3148 | 1033       | 32.8 [31.2,34.5] | 604   | 58.5 [55.4,61.4] | 525       | 50.8 [47.8,53.9] | 148     | 14.3 [12.3,16.6] | 525                   | 86.9 [84.0,89.4] | 148                 | 24.5 [21.2,28.1] |
| <b>Punjab - Bathinda</b>           |      |            |                  |       |                  |           |                  |         |                  |                       |                  |                     |                  |
| Male                               | 1280 | 403        | 31.5 [29.0,34.1] | 170   | 42.2 [37.5,47.1] | 103       | 25.6 [21.5,30.0] | 15      | 3.7 [2.3,6.1]    | 103                   | 60.6 [53.1,67.7] | 15                  | 8.8 [5.4,14.1]   |
| Female                             | 1854 | 476        | 25.7 [23.7,27.7] | 302   | 63.4 [59.0,67.7] | 219       | 46.0 [41.6,50.5] | 52      | 10.9 [8.4,14.1]  | 219                   | 72.5 [67.2,77.3] | 52                  | 17.2 [13.4,21.9] |
| <45 years                          | 2061 | 370        | 18.0 [16.4,19.7] | 152   | 41.1 [36.2,46.2] | 84        | 22.7 [18.7,27.3] | 22      | 6.0 [4.0,8.9]    | 84                    | 55.3 [47.3,63.0] | 22                  | 14.5 [9.7,21.0]  |
| >=45 years                         | 1073 | 509        | 47.4 [44.5,50.4] | 320   | 62.9 [58.6,67.0] | 238       | 46.8 [42.5,51.1] | 45      | 8.8 [6.7,11.6]   | 238                   | 74.4 [69.3,78.9] | 45                  | 14.1 [10.7,18.3] |
| All                                | 3134 | 879        | 28.0 [26.5,29.6] | 472   | 53.7 [50.4,57.0] | 322       | 36.6 [33.5,39.9] | 67      | 7.6 [6.0,9.6]    | 322                   | 68.2 [63.9,72.3] | 67                  | 14.2 [11.3,17.6] |
| <b>Madhya Pradesh - Ratlam</b>     |      |            |                  |       |                  |           |                  |         |                  |                       |                  |                     |                  |
| Male                               | 1543 | 347        | 22.5 [20.5,24.6] | 75    | 21.6 [17.6,26.3] | 40        | 11.5 [8.6,15.3]  | 11      | 3.2 [1.8,5.6]    | 40                    | 53.3 [42.1,64.3] | 11                  | 14.7 [8.3,24.6]  |
| Female                             | 1864 | 324        | 17.4 [15.7,19.2] | 116   | 35.8 [30.8,41.2] | 75        | 23.1 [18.9,28.1] | 19      | 5.9 [3.8,9.0]    | 75                    | 64.7 [55.6,72.8] | 19                  | 16.4 [10.7,24.3] |
| <45 years                          | 2221 | 257        | 11.6 [10.3,13.0] | 39    | 15.2 [11.3,20.1] | 20        | 7.8 [5.1,11.8]   | 6       | 2.3 [1.1,5.1]    | 20                    | 51.3 [36.0,66.4] | 6                   | 15.4 [7.1,30.3]  |
| >=45 years                         | 1186 | 414        | 34.9 [32.2,37.7] | 152   | 36.7 [32.2,41.5] | 95        | 22.9 [19.1,27.2] | 24      | 5.8 [3.9,8.5]    | 95                    | 62.5 [54.5,69.8] | 24                  | 15.8 [10.8,22.5] |
| All                                | 3407 | 671        | 19.7 [18.4,21.1] | 191   | 28.5 [25.2,32.0] | 115       | 17.1 [14.5,20.2] | 30      | 4.5 [3.1,6.3]    | 115                   | 60.2 [53.1,66.9] | 30                  | 15.7 [11.2,21.6] |
| <b>Madhya Pradesh - Chhindwara</b> |      |            |                  |       |                  |           |                  |         |                  |                       |                  |                     |                  |
| Male                               | 1336 | 314        | 23.5 [21.3,25.9] | 53    | 16.9 [13.1,21.4] | 37        | 11.8 [8.7,15.8]  | 12      | 3.8 [2.2,6.6]    | 37                    | 69.8 [56.3,80.6] | 12                  | 22.6 [13.3,35.8] |
| Female                             | 1809 | 430        | 23.8 [21.9,25.8] | 110   | 25.6 [21.7,29.9] | 98        | 22.8 [19.1,27.0] | 25      | 5.8 [4.0,8.5]    | 98                    | 89.1 [81.8,93.7] | 25                  | 22.7 [15.8,31.5] |

|                            |      |     |                  |     |                  |     |                  |     |                  |     |                  |     |                  |
|----------------------------|------|-----|------------------|-----|------------------|-----|------------------|-----|------------------|-----|------------------|-----|------------------|
| <45 years                  | 2052 | 273 | 13.3 [11.9,14.8] | 31  | 11.4 [8.1,15.7]  | 23  | 8.4 [5.7,12.4]   | 7   | 2.6 [1.2,5.3]    | 23  | 74.2 [56.2,86.5] | 7   | 22.6 [11.2,40.4] |
| >=45 years                 | 1093 | 471 | 43.1 [40.2,46.0] | 132 | 28.0 [24.2,32.3] | 112 | 23.8 [20.1,27.8] | 30  | 6.4 [4.5,9.0]    | 112 | 84.8 [77.7,90.0] | 30  | 22.7 [16.4,30.7] |
| All                        | 3145 | 744 | 23.7 [22.2,25.2] | 163 | 21.9 [19.1,25.0] | 135 | 18.1 [15.5,21.1] | 37  | 5.0 [3.6,6.8]    | 135 | 82.8 [76.2,87.9] | 37  | 22.7 [16.9,29.8] |
| <b>Maharastra - Wardha</b> |      |     |                  |     |                  |     |                  |     |                  |     |                  |     |                  |
| Male                       | 1573 | 302 | 19.2 [17.3,21.2] | 104 | 34.4 [29.3,40.0] | 84  | 27.8 [23.1,33.1] | 46  | 15.2 [11.6,19.7] | 84  | 80.8 [72.1,87.2] | 46  | 44.2 [35.0,53.9] |
| Female                     | 1846 | 323 | 17.5 [15.8,19.3] | 167 | 51.7 [46.3,57.1] | 139 | 43.0 [37.7,48.5] | 63  | 19.5 [15.5,24.2] | 139 | 83.2 [76.8,88.2] | 63  | 37.7 [30.7,45.3] |
| <45 years                  | 2000 | 183 | 9.2 [8.0,10.5]   | 42  | 23.0 [17.4,29.6] | 29  | 15.8 [11.2,21.9] | 11  | 6.0 [3.4,10.5]   | 29  | 69.0 [53.7,81.1] | 11  | 26.2 [15.1,41.4] |
| >=45 years                 | 1419 | 442 | 31.1 [28.8,33.6] | 229 | 51.8 [47.1,56.4] | 194 | 43.9 [39.3,48.6] | 98  | 22.2 [18.5,26.3] | 194 | 84.7 [79.5,88.8] | 98  | 42.8 [36.5,49.3] |
| All                        | 3419 | 625 | 18.3 [17.0,19.6] | 271 | 43.4 [39.5,47.3] | 223 | 35.7 [32.0,39.5] | 109 | 17.4 [14.7,20.6] | 223 | 82.3 [77.3,86.4] | 109 | 40.2 [34.5,46.2] |
| <b>Telangana - Jagtial</b> |      |     |                  |     |                  |     |                  |     |                  |     |                  |     |                  |
| Male                       | 1127 | 269 | 23.9 [21.5,26.4] | 155 | 57.6 [51.6,63.4] | 122 | 45.4 [39.5,51.3] | 52  | 19.3 [15.0,24.5] | 122 | 78.7 [71.6,84.5] | 52  | 33.5 [26.6,41.3] |
| Female                     | 2226 | 404 | 18.1 [16.6,19.8] | 262 | 64.9 [60.1,69.4] | 189 | 46.8 [42.0,51.7] | 93  | 23.0 [19.2,27.4] | 189 | 72.1 [66.4,77.2] | 93  | 35.5 [29.9,41.5] |
| <45 years                  | 2029 | 162 | 8.0 [6.9,9.3]    | 67  | 41.4 [34.0,49.1] | 45  | 27.8 [21.4,35.2] | 20  | 12.3 [8.1,18.4]  | 45  | 67.2 [55.1,77.3] | 20  | 29.9 [20.1,41.8] |
| >=45 years                 | 1324 | 511 | 38.6 [36.0,41.2] | 350 | 68.5 [64.3,72.4] | 266 | 52.1 [47.7,56.4] | 125 | 24.5 [20.9,28.4] | 266 | 76.0 [71.2,80.2] | 125 | 35.7 [30.9,40.9] |
| All                        | 3353 | 673 | 20.1 [18.7,21.5] | 417 | 62.0 [58.2,65.6] | 311 | 46.2 [42.5,50.0] | 145 | 21.5 [18.6,24.8] | 311 | 74.6 [70.2,78.5] | 145 | 34.8 [30.3,39.5] |
| <b>Telangana - Jangaon</b> |      |     |                  |     |                  |     |                  |     |                  |     |                  |     |                  |
| Male                       | 1197 | 298 | 24.9 [22.5,27.4] | 145 | 48.7 [43.0,54.3] | 111 | 37.2 [31.9,42.9] | 38  | 12.8 [9.4,17.0]  | 111 | 76.6 [69.0,82.7] | 38  | 26.2 [19.7,34.0] |
| Female                     | 1981 | 481 | 24.3 [22.4,26.2] | 298 | 62.0 [57.5,66.2] | 232 | 48.2 [43.8,52.7] | 92  | 19.1 [15.9,22.9] | 232 | 77.9 [72.8,82.2] | 92  | 30.9 [25.9,36.4] |
| <45 years                  | 1606 | 166 | 10.3 [8.9,11.9]  | 65  | 39.2 [32.0,46.8] | 34  | 20.5 [15.0,27.3] | 13  | 7.8 [4.6,13.0]   | 34  | 52.3 [40.3,64.1] | 13  | 20.0 [12.0,31.5] |
| >=45 years                 | 1572 | 613 | 39.0 [36.6,41.4] | 378 | 61.7 [57.7,65.4] | 309 | 50.4 [46.5,54.4] | 117 | 19.1 [16.2,22.4] | 309 | 81.7 [77.5,85.3] | 117 | 31.0 [26.5,35.8] |
| All                        | 3178 | 779 | 24.5 [23.0,26.0] | 443 | 56.9 [53.4,60.3] | 343 | 44.0 [40.6,47.5] | 130 | 16.7 [14.2,19.5] | 343 | 77.4 [73.3,81.1] | 130 | 29.3 [25.3,33.8] |

|                   |       |      |                  |      |                  |      |                  |      |                  |      |                  |      |                  |  |
|-------------------|-------|------|------------------|------|------------------|------|------------------|------|------------------|------|------------------|------|------------------|--|
| Kerala - Kannur   |       |      |                  |      |                  |      |                  |      |                  |      |                  |      |                  |  |
| Male              | 957   | 227  | 23.7 [21.1,26.5] | 143  | 63.0 [56.5,69.0] | 107  | 47.1 [40.7,53.6] | 43   | 18.9 [14.4,24.6] | 107  | 74.8 [67.1,81.3] | 43   | 30.1 [23.1,38.1] |  |
| Female            | 2302  | 555  | 24.1 [22.4,25.9] | 388  | 69.9 [66.0,73.6] | 321  | 57.8 [53.7,61.9] | 121  | 21.8 [18.6,25.4] | 321  | 82.7 [78.6,86.2] | 121  | 31.2 [26.8,36.0] |  |
| <45 years         | 1580  | 93   | 5.9 [4.8,7.2]    | 46   | 49.5 [39.5,59.5] | 26   | 28.0 [19.8,37.9] | 10   | 10.8 [5.9,18.8]  | 26   | 56.5 [42.0,70.0] | 10   | 21.7 [12.1,35.9] |  |
| >=45 years        | 1679  | 689  | 41.0 [38.7,43.4] | 485  | 70.4 [66.9,73.7] | 402  | 58.3 [54.6,62.0] | 154  | 22.4 [19.4,25.6] | 402  | 82.9 [79.3,86.0] | 154  | 31.8 [27.8,36.0] |  |
| All               | 3259  | 782  | 24.0 [22.6,25.5] | 531  | 67.9 [64.5,71.1] | 428  | 54.7 [51.2,58.2] | 164  | 21.0 [18.3,24.0] | 428  | 80.6 [77.0,83.7] | 164  | 30.9 [27.1,34.9] |  |
| Kerala - Thrissur |       |      |                  |      |                  |      |                  |      |                  |      |                  |      |                  |  |
| Male              | 1222  | 354  | 29.0 [26.5,31.6] | 234  | 66.1 [61.0,70.8] | 173  | 48.9 [43.7,54.1] | 60   | 16.9 [13.4,21.2] | 173  | 73.9 [67.9,79.2] | 60   | 25.6 [20.5,31.6] |  |
| Female            | 1962  | 507  | 25.8 [24.0,27.8] | 365  | 72.0 [67.9,75.7] | 298  | 58.8 [54.4,63.0] | 133  | 26.2 [22.6,30.2] | 298  | 81.6 [77.3,85.3] | 133  | 36.4 [31.7,41.5] |  |
| <45 years         | 1521  | 124  | 8.2 [6.9,9.6]    | 42   | 33.9 [26.1,42.6] | 27   | 21.8 [15.4,29.9] | 17   | 13.7 [8.7,21.0]  | 27   | 64.3 [48.9,77.2] | 17   | 40.5 [26.9,55.7] |  |
| >=45 years        | 1663  | 737  | 44.3 [41.9,46.7] | 557  | 75.6 [72.3,78.5] | 444  | 60.2 [56.7,63.7] | 176  | 23.9 [20.9,27.1] | 444  | 79.7 [76.2,82.9] | 176  | 31.6 [27.9,35.6] |  |
| All               | 3184  | 861  | 27.0 [25.5,28.6] | 599  | 69.6 [66.4,72.6] | 471  | 54.7 [51.4,58.0] | 193  | 22.4 [19.8,25.3] | 471  | 78.6 [75.2,81.7] | 193  | 32.2 [28.6,36.1] |  |
| All-District      |       |      |                  |      |                  |      |                  |      |                  |      |                  |      |                  |  |
| Male              | 11413 | 2956 | 25.9 [25.1,26.7] | 1264 | 42.8 [41.0,44.6] | 924  | 31.3 [29.6,33.0] | 303  | 10.3 [9.2,11.4]  | 924  | 73.1 [70.6,75.5] | 303  | 24.0 [21.7,26.4] |  |
| Female            | 17814 | 4091 | 23.0 [22.4,23.6] | 2427 | 59.3 [57.8,60.8] | 1949 | 47.6 [46.1,49.2] | 720  | 17.6 [16.5,18.8] | 1949 | 80.3 [78.7,81.8] | 720  | 29.7 [27.9,31.5] |  |
| <45 years         | 16956 | 1978 | 11.7 [11.2,12.2] | 648  | 32.8 [30.7,34.9] | 423  | 21.4 [19.6,23.2] | 160  | 8.1 [7.0,9.4]    | 423  | 65.3 [61.5,68.8] | 160  | 24.7 [21.5,28.2] |  |
| >=45 years        | 12271 | 5069 | 41.3 [40.4,42.2] | 3043 | 60.0 [58.7,61.4] | 2450 | 48.3 [47.0,49.7] | 863  | 17.0 [16.0,18.1] | 2450 | 80.5 [79.1,81.9] | 863  | 28.4 [26.8,30.0] |  |
| All               | 29227 | 7047 | 24.1 [23.6,24.6] | 3691 | 52.4 [51.2,53.5] | 2873 | 40.8 [39.6,41.9] | 1023 | 14.5[13.7,15.4]  | 2873 | 77.8 [76.5,79.1] | 1023 | 27.7 [26.3,29.2] |  |

Supplementary Table 4: Mean difference between first and second reading, first and third reading and second and third reading for systolic and diastolic blood pressure for community survey in nine districts in India, 2018-19.

| BP Readings (n = 7047)          | First     | Second    | Diff (95% CI)   | First     | Third     | Diff (95% CI)   | Second    | Third     | Diff (95% CI)      |
|---------------------------------|-----------|-----------|-----------------|-----------|-----------|-----------------|-----------|-----------|--------------------|
|                                 | Mean (SD) | Mean (SD) |                 | Mean (SD) | Mean (SD) |                 | Mean (SD) | Mean (SD) |                    |
| Systolic blood pressure (mmHg)  | 155 (20)  | 152 (20)  | 3.1 (2.8 - 3.3) | 155 (20)  | 152 (19)  | 3.7 (3.5 - 4.0) | 152 (20)  | 152 (19)  | 0.7 (0.4 - 0.9)    |
| Diastolic blood pressure (mmHg) | 90 (12)   | 89 (12)   | 0.9 (0.8 - 1.1) | 90 (12)   | 90 (12)   | 0.6 (0.4 - 0.8) | 89 (12)   | 90 (12)   | -0.3 (-0.5 - -0.2) |
